# Supplementary material for: Establishment of tetracycline-regulated bimolecular fluorescence complementation assay to detect protein-protein interactions in Candida albicans
Source: PubMed Central journal article supplement (PMC7031294; doi:10.1038/s41598-020-59891-7), 2020-02-19
Supplement: 41598_2020_59891_MOESM1_ESM.pdf [file 41598_2020_59891_MOESM1_ESM.pdf]

## Supplementary Information

Establishment of tetracycline-regulated bimolecular fluorescence complementation assay to detect protein-protein interactions in *Candida albicans*

Running title: BiFC in *Candida albicans*

Wei-Chung Lai<sup>1§</sup>, H. Sunny Sun<sup>2</sup>, and Jia-Ching Shieh<sup>1,3,4\*</sup>

<sup>1</sup>Department of Biomedical Sciences, Chung Shan Medical University, Taiwan, R.O.C.

<sup>2</sup>Institute of Molecular Medicine, College of Medicine, National Cheng Kung University, Taiwan, R.O.C.

<sup>3</sup>Department of Medical Research, Chung Shan Medical University Hospital, Taiwan, R.O.C.

<sup>4</sup>Immunology Research Centre, Chung Shan Medical University

\*Corresponding author:

Dr. Jia-Ching Shieh

Department of Biomedical Sciences, Chung Shan Medical University, No. 110, Sec.1, Jianguo N. Road, Taichung City 40201, Taiwan, R.O.C.

Phone: +886-4-24730022, ext. 11806

Fax: +886-4-2475-7412

E-mail: jcs@csmu.edu.tw

§Current address:

Dr. Wei-Chung Lai

Institute of Molecular Medicine, National Cheng Kung University Medical College, Taiwan, R.O.C.

E-mail: workman\_pum250@hotmail.com

## **Supplementary information**

### **List of Contents**

1. Supplemental Materials and Methods
2. Supplemental Figure legends
3. Supplemental Figure 1 (Figure S1)
4. Supplemental Figure 2 (Figure S2)
5. Supplemental Figure 3 (Figure S3)
6. Supplemental Figure 1 (Figure S4)
7. Supplemental Figure 1 (Figure S5)
8. Supplemental Figure 1 (Figure S6)
9. Supplemental Figure 1 (Figure S7)
10. Supplemental Figure 1 (Figure S8)
11. Supplemental Table 1 (Table S1)
12. Supplemental Table 2 (Table S2)
13. Supplemental Table 2 (Table S3)

# 1. Supplemental Materials and Methods

## Construction of Tet-on Plasmids

We aimed to set up a Tet-on-based BiFC assay; thus, we developed an additional Tet-on system with hygromycin B resistance in *C. albicans* following the construction of pNIM1<sup>1</sup>. To efficiently utilize the pNIM1 vector described in our previous study<sup>2</sup>, a pair of primers, CaGFP-N-MCS and CaGFP-C-MCS, was designed to incorporate multiple cloning sites to the 5' and 3' ends of the GFPmut2-coding sequence by PCR, followed by digesting with *SalI/BclI* and cloning back into *SalI/BglII*-linearized pNIM1 to obtain pNIM1-NC (Figure S1). To construct the additional pWTN2 plasmid for red fluorescent validation, the assembly was divided into three steps. **(1) Construction of pBSII-TDH3p-rtTA-ACT1t.** The pWTN2 plasmid was designed for gene targeting at the *CaTDH3* locus due to its promoter, which is capable of constitutively driving reverse tetracycline-controlled transactivator (rtTA) expression. This promoter was amplified with the TDH3 SacII F and TDH3 XbaI R primers from genomic wild-type DNA and subsequently cloned into pBluescriptII SK(+) (pBSII) digested with *SacII/XbaI* to create pBSII-CaTDH3p. The rtTA coding sequence was coupled to the *CaACT1* transcription terminator released from pNIM1, subcloned into pBSII-TDH3p and then digested with *XbaI/PstI* to produce pBSII-TDH3p-rtTA-ACT1t. **(2) Construction of pBSII-SFS-HygB.** To create a backbone vector with hygromycin B resistance for the assembly of the components in the tetracycline-regulated system, the pSFS2A plasmid<sup>3</sup> was digested with *SalI* to release a

part of the DNA fragment containing the *SpeI* site within the CaSAT1 gene and ligated into itself to obtain pSFS2A-*SpeI* with one remaining *SpeI* site. To replace the backbone of pBSII, the DNA cassette of pSFS2A-*SpeI* between two FRT sequences was digested with *KpnI/SacI* and subcloned into pBSII to generate pBSII-SFS2A-*SpeI*. To incorporate more suitable restriction enzyme sites flanking the FRT sequences, two DNA duplexes formed by two pairs of primers, MCS3 F/MCS3 R and MCS4 F/MCS4 R, were sequentially cloned into pBSII-SFS2A-*SpeI* via *SpeI/SacI* and then via *KpnI/XhoI* digestion to become pBSII-SFS-MCS4. The synthetic hygromycin B gene (*CaHygB*) was amplified with the HygB *BglII* F and HygB *NsiI* R primers using pYM70<sup>4</sup> as a DNA template, cut out with *BglII/NsiI*, and cloned into pBSII-SFS-MCS4 digested with *BamHI/PstI* to release a part of the SAT1-flipper to generate pBSII-SFS-HygB. (3) Construction of pCR2-TDH3t-TetO7-miniOP4-GFPt. To construct seven copies of the tetracycline operator (*tetO*), a unit of the *tetO* adaptor formed by annealing with a pair of primers, TetO F and TetO R, was cloned into pBSII-HA-2xStrepII (our unpublished data) digested with *PmeI/SacI* to produce pBSII-TetO1. Then, another adaptor was digested with *PmeI/SalI* and cloned into pBSII-TetO1 digested with *PmeI/XhoI* to generate pBSII-TetO2. This step was repeated five times to construct pBSII-TetO7. We used the multiple cloning site (MCS) of pCR2.0 for plasmid building by digesting TetO7 with *KpnI/SacI* and subcloning into pCR2.0 to generate pCR2-TetO7. To fuse the minimal *CaOP4* promoter (miniOP4) to TetO7, the promoter was

PCR-amplified with the miniOP4 SpeI F and miniOP4 XhoI R primers using pNIM1 as a DNA template; the construct was then digested with *XhoI/SpeI* and cloned into pCR2-TetO7 digested with *SalI/SpeI* to become pCR2-TetO7-miniOP4. A DNA fragment homologous to *CaTDH3* for gene targeting was amplified with the TDH3t PmeI F2 and TDH3t KpnI R2 primers, digested with *PmeI/KpnI*, and cloned into pCR2-TetO7-miniOP4 to generate pCR2-TDH3t-TetO7-miniOP4. Similar to pNIM1, a GFPmut2-coding sequence linked to the *CaACT1* transcriptional terminator was amplified with the GFPt XbaI F and GFPt SpeI R primers from the pNIM1-NC template, digested with *XbaI/SpeI*, and cloned into pCR2-TDH3t-TetO7-miniOP4 to produce pCR2-TDH3t-TetO7-miniOP4-GFPt. To assemble the pWTN1 plasmid, a prototype of pWTN2, from these three constructs, the DNA fragment comprising TDH3p-rtTA-ACT1t was released from the pBSII-TDH3p-rtTA-ACT1t plasmid via *PstI/SacII* digestion and was cloned into pBSII-SFS-HygB linearized with *PstI/SacII* to create pBSII-TDH3p-rtTA-HygB; then, another DNA fragment containing TDH3t-TetO7-miniOP4-GFPt was released from pCR2-TDH3t-TetO7-miniOP4-GFPt via *KpnI/AgeI* digestion and cloned into pBSII-TDH3p-rtTA-HygB to generate pWTN1 (Figure S1). To replace the GFPmut2-coding sequence of pWTN1 with yEmRFP (yeast enhanced red fluorescent protein, as well as mCherry)<sup>5</sup>, which is a codon-optimized RFP for *C. albicans*, a pair of primers, mRFP NotI F and mRFP AatII R and pFA-yEmRFP-CmLEU2-2 $\mu$  (our unpublished data), was used as a DNA template to amplify a coding sequence of yEmRFP; the

construct was digested with *NotI/AatII* and cloned into pWTN1 to generate pWTN2 (Figure S1). For fluorescent labelling of septin, the coding sequences of *CaCdc10* and *CaCdc11* were digested with *NheI/XhoI* and *AatII/BglII* from pTET25M-CDC11-GFP and pTET25M-RFP-CDC10 (our unpublished data) and cloned into pNIM1-NC and pWTN2, respectively, to generate pNIM1-CDC11-GFPmut2 and pWTN2-mCherry-CDC10 (Figure S2).

### **Design of the BiFC assay**

To fit the Tet-on systems for the BiFC assay, mCherry was used as a reporter in this study. Split-mCherry, which is capable of reassembling, was divided into an N-terminal fragment containing amino acids 1-159 and a C-terminal fragment containing amino acids 160-237<sup>6</sup>. The triple repeats of the GGGGS amino acid sequence were used to increase structural flexibility between a target gene and fragments of the reporter. To create DNA segments encoding the GGGGS amino acid sequence, we designed a pair of primers, GS F and GS R, to form a single unit of GS adaptor by annealing to each other and subsequently ligating into pBSII digested with *EcoRV/BamHI* to become pBSII-GS1. Then, two additional GS adaptors were sequentially cloned into pBSII-GS1 digested with *EcoRV/BglII* to obtain pBSII-GS3, which was used as an intermediate vector for fusion with the targets and split fragments in the Tet-on system. To construct pWTN1-6H-MCS-RN, which is capable of expressing the

C-terminal end of the target protein with a polyhistidine tag (6H) fused to the N-terminal fragment of mCherry (RN), both the DNA sequences encoding 6H and RN were incorporated into pWTN1. The DNA adaptor encoding six histidine residues made by a pair of primers, WTN1-His F and WTN1-His R, was cloned into pWTN1 digested with *SpeI/EcoRV* to obtain pWTN1-6H. Subsequently, pWTN1-6H was digested with *KpnI/BglIII* and ligated into *KpnI/BglIII*-digested pBSII-GS3 to become pBSII-WTN1-6H-GS3. The DNA fragment encoding the N-terminal fragment of mCherry was PCR-amplified with primers, mRFP N BamHI F and mRFP N NotI R, and with pWTN2 as the DNA template and HiFi DNA polymerase (Kapa Biosystems), the fragment was then cloned into *BamHI/NotI*-digested pBSII to obtain pBSII-RN. Next, the WTN1-6H-GS3 DNA fragment was released from pBSII-WTN1-GS3 by digesting with *KpnI/BamHI* and was cloned into pBSII-RN to create pBSII-WTN1-6H-GS3-RN. Finally, the WTN1-6H-GS3-RN DNA fragment was released from this plasmid digested with *KpnI/StuI* and was cloned into pWTN1 to generate pWTN1-6H-MCS-RN. To create a vector capable of expressing the N-terminal fragment of mCherry to use as a control, this encoding fragment was amplified with a pair of primers, RedN KpnI F and mRFP N NotI R, following *SpeI/StuI* digestion and cloned into pWTN1 to generate pWTN1-RN. To construct another vector, pNIM1-RC-MCS, which is capable of producing the N-terminal end of the target protein fused to the C-terminal fragment of mCherry (RC), the pNIM1-NC was used and modified by a similar strategy described above.

The DNA fragment released from pNIM1 by *KpnI/SalI* digestion was cloned into *KpnI/SalI*-digested pBSII-GS3 to obtain pBSII-NIM1-GS3. The DNA encoding the C-terminal fragment of mCherry was PCR-amplified with the primers using pWTN2 as a DNA template; after *XhoI/BamHI* digestion, the fragment was cloned into *SalI/BglII*-digested pBSII-NIM1-GS3 to produce pBSII-NIM1-RC-GS3. The NIM1-RC-GS3 DNA fragment was released from this plasmid by *KpnI/SpeI* digestion and cloned into *KpnI/SpeI*-digested pCR2-TDH3t-OP-GFPt to produce pCR2-NIM1-RC-GS3-GFPt. Finally, the NIM1-RC-GS3-GFPt DNA fragment released from pCR2-NIM1-RC-GS3-GFPt digested with *KpnI/StuI* was cloned into *KpnI/StuI*-digested pNIM1-NC to generate pNIM1-RC-MCS. To generate a vector capable of expressing the C-terminal fragment of mCherry as a control, this encoding fragment was amplified and produced with a pair of primers, mRFP C *XhoI* F and mRFP C *BamHI* R, and with pWTN2 as a template; after *XhoI/BamHI* digestion, the fragment was cloned into *SalI/BglII*-digested pNIM1 to become pNIM1-RC. Then, the coding sequences of *CaCDC42* and *CaRDII* were amplified with the CDC42 *EcoRV* F and CDC42 *BglII* R, and RDI1 *SpeI* F and RDI1 *StuI* R primers, respectively, and cloned into pWTN1-6H-MCS-RN and pNIM1-RC-MCS to produce pWTN1-6H-CDC42-RN and pNIM1-RC-RDI1 (Figure S3). To construct a vector, pWTN1-RN-CDC42 (Figure S3), capable of expressing the N-terminal mCherry fusion to CDC42, a PCR-amplified DNA fragment encoding amino acids 1- 159 of the mCherry protein by a pair of primers, RedN



*KpnI* F and RedN *EcoRV* R, was cloned into the pBSII-GS3 plasmid linearized with *KpnI* and *EcoRV* to obtain pBSII-RN-GS3. Next, a PCR-amplified coding fragment of CDC42 by a pair of primers, CaCDC42 *BamHI* F and CaCDC42 *NotI* R, was cloned into pBSII-RN-GS3 linearized with *BamHI* and *NotI* to obtain pBSII-RN-GS3-CDC42. Finally, the DNA fragment containing the RN-GS3-CDC42 region was released by *SpeI/StuI* and cloned into pWTN2 digested with *SpeI/StuI* to obtain pWTN1-RN-CDC42 (Figure S3).

## References

- 1 Park, Y. N. & Morschhauser, J. Tetracycline-inducible gene expression and gene deletion in *Candida albicans*. *Eukaryot Cell* **4**, 1328-1342, doi:10.1128/EC.4.8.1328-1342.2005 (2005).
- 2 Lai, W. C. *et al.* Construction of *Candida albicans* Tet-on tagging vectors with a Ura-blaster cassette. *Yeast* **28**, 253-263, doi:10.1002/yea.1833 (2011).
- 3 Reuss, O., Vik, A., Kolter, R. & Morschhauser, J. The SAT1 flipper, an optimized tool for gene disruption in *Candida albicans*. *Gene* **341**, 119-127, doi:10.1016/j.gene.2004.06.021 (2004).
- 4 Basso, L. R., Jr. *et al.* Transformation of *Candida albicans* with a synthetic hygromycin B resistance gene. *Yeast* **27**, 1039-1048, doi:10.1002/yea.1813 (2010).
- 5 Keppler-Ross, S., Noffz, C. & Dean, N. A new purple fluorescent color marker for genetic studies in *Saccharomyces cerevisiae* and *Candida albicans*. *Genetics* **179**, 705-710, doi:10.1534/genetics.108.087080 (2008).
- 6 Fan, J. Y. *et al.* Split mCherry as a new red bimolecular fluorescence complementation system for visualizing protein-protein interactions in living cells. *Biochem Biophys Res Commun* **367**, 47-53, doi:10.1016/j.bbrc.2007.12.101 (2008).

## 2. Supplementary figure legends

**Figure S1.** The maps of pNIM1-NC, pWTN1, and pWTN2 used in this study.

(A) The functional elements of the Tet-on system are shown to present the cassettes of pNIM1-NC, pWTN1 and pWTN2. *ADH1p*: *CaADH1* promoter, *rTetR*: the coding sequence of rtTA, *ACT1t*: *CaACT1* transcription terminator, *HygB*: *CaHygB* serves as a dominant selectable marker offering hygromycin B resistance, *TetO*: a Tet operator sequence fused to a minimal *CaOP4* promoter, *ADH1t*: a part of *CaADH1* for homologous recombination. Restriction enzyme sites, *SacII* and *KpnI*, were used to linearise the cassettes. (B) The multiple cloning sites (MCS) of pNIM1-NC are shown. (C) The MCS of pWTN1 are shown. (D) The MCS of pWTN2 are shown. TAA was designed as the stop codon of coding sequence.

**Figure S2.** Confirmation of the strains carrying the cassettes, pNIM1-NC, pWTN1, pWTN2, or both by yeast colony PCR. The 1082 bp of amplicons were expanded with primers, pNIM1-inte F and pNIM1-inte R, to indicate the *CaADH1* integration of pNIM1-NC in WCL101. The 1336 bp of amplicons were expanded with primers, CaTDF3 F and pNIM1-inte R, to indicate the *CaTDH3* integration of pWTN1 in WCL102 or pWTN2 in WCL103. Two amplicons were obtained simultaneously from WCL104 and WCL105 with

multiplex PCR with primers, pNIM1-inte F, pNIM1-inte R and CaTDH3 F. SC5314 was used as negative control.

**Figure S3.** Pink colonies of WCL103 and WCL 105 under doxycycline-induced conditions.

The cells of the strains, WCL101, WCL102, WCL103, WCL104, WCL105 and SC5314 were grown onto synthetic minimal medium with and without 40 µg/ml doxycycline at 30°C and 37°C for 2 days. The colonies of WCL103 and WCL105 turned into pink, but the other strains sustained as white. The enlarged images “a” and “b” from the original images at 37°C in the presence of doxycycline.

**Figure S4.** The triplicate western blots to quantify the expression levels of fluorescent proteins in the strains, WCL101, WCL102, WCL103, WCL104, and WCL105, with a variety of doxycycline doses. Dox: the dose of doxycycline. (A) The western blots used to analyse the GFPmut2 expression of the stains WCL101, WCL102, WCL104, and WCL105 with anti-GFP antibodies. (B) The western blots used to detect the mCherry expression of the strains WCL103 and WCL105 with anti-mCherry antibodies. As the strain WCL105 is capable of expressing GFPmut2 and mCherry in the presence of doxycycline, two western blots were used, as shown in (A) and (B), respectively. The red cropped blots were those used in Figure 2 as representatives. The fold changes of the expression of GFPmut2 and mCherry

from triplicate blots were listed in Table S1. Statistical analyses proceeded with one-way ANOVA with Bonferroni's comparison test listed in Table S2.

**Figure S5.** The maps of pNIM1-CDC11-GFP and pWTN2-mCherry-CDC10.

The coding sequence of *CaCDC11* was cloned into pNIM1-NC with *XhoI* and *NheI*, and the coding sequence of *CaCDC10* was cloned into pWTN2 with *AatII* and *BglII*.

**Figure S6.** The maps of pWTN1-6H-CDC42-RN, pWTN1-RN-CDC42, and

pNIM1-RC-RDI1. RN: the coding sequence of N-terminus of mCherry, RC: the coding sequence of C-terminus of mCherry, 3xGGGGS: triple repeats of the coding sequence translated into amino acids GGGGS. The coding sequence of *CaCDC42* was cloned into pWTN1-6H-RN with *EcoRV* and *BglII* and into pWTN1-RN with *SpeI* and *StuI*. The coding sequence of *CaRDII* was cloned into pNIM-RC with *SpeI* and *StuI*.

**Figure S7.** Verification of the strains expressing one or two components of the

mCherry-based BiFC assay under the doxycycline-induced conditions by western blotting. (A)

The cells of the strains, as indicated in the figure, were grown in YPD containing 40  $\mu\text{g/ml}$  of

doxycycline for 3 hours before extracting the total lysates for 16% SDS-PAGE and western blotting with an anti-mCherry antibody. Each emerged band represents the indicated essential component in the BiFC assay (shown in brackets). The total lysate extracted from the wild-type SC5314 is used as a negative control.  $\beta$ -actin is used as a loading control. (B) The cells of the indicated strains were grown in YPD containing 40  $\mu$ g/ml of doxycycline for 3 hours. The total lysates were separated with 12% SDS-PAGE, followed by western blotting analysis with an anti-mCherry antibody. Arrows indicate the distinguishable *CaCdc42*-RN, RN-*CaCdc42*, and RC-*CaRdi1* fusions on the blots. The Ponceau S staining shows the equal loading of the blot.

**Figure S8.** The fluorescent images from strains WCL111, WCL112, WCL113, WCL108, WCL125, and WCL118. The images of five fields from each strain were randomly selected. These images were used in the quantification of the relative fluorescence intensity. In the fields of the strains WCL111, WCL112, and WCL125, the degraded cells showed unexpected fluorescence (white arrows). Scale bar indicates 10  $\mu$ m. The raw data and statistical analyses of one-way ANOVA with Bonferroni's comparison test were listed in Table S3.

# Figure S1.

## A

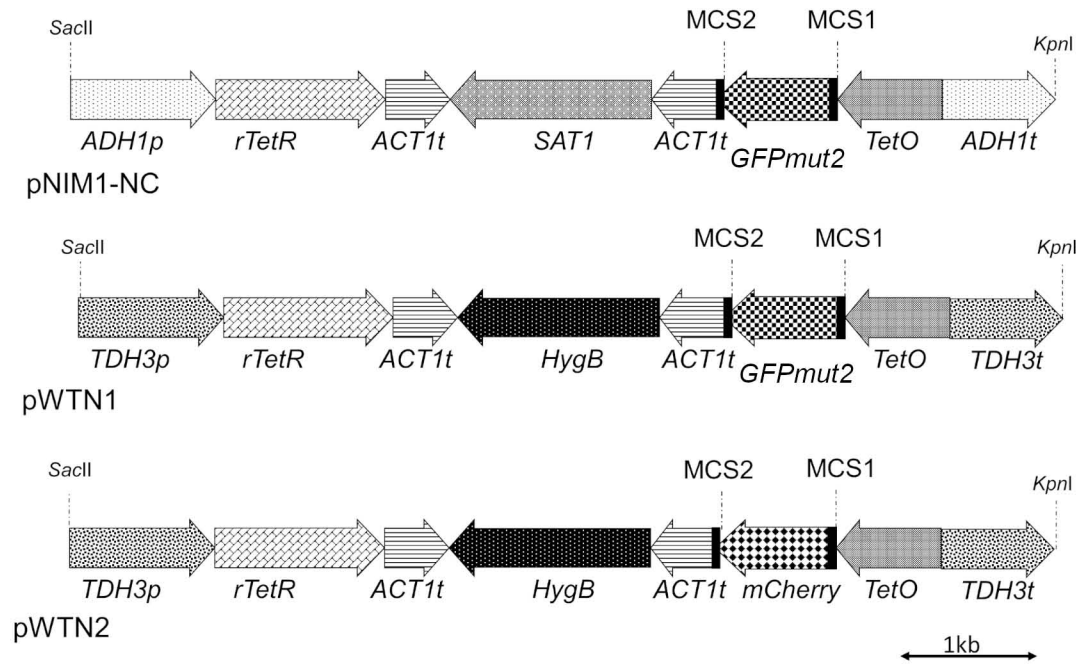

## B

pNIM1-NC  
MCS1

OP4 minimal promoter  
TACGTTAACTCCTACACACATACAAATATAATA<sup>+</sup>

GTC GAC TCG AGA TAT CCA GCT AGC GGC CGC GTG ACC ATG AGT AAG<sup>+</sup> GFPmut2

Sall XhoI EcoRV NheI NotI

MCS2

GFPmut2  
GGC ATG GAT GAA CTA TAC AAA<sup>+</sup> STOP

GGT CCG GAC GTC AGC TTA AGA TCT AGG CCT GCA TAA TGA TCT

BspEI AatII AflII BglII StuI

## C

pWTN1  
MCS1

OP4 minimal promoter  
TACGTTAACTCCTACACACATACAAATATAATA<sup>+</sup>

ACT AGT GTC GAC TCG AGA TAT CCA GCT AGC GGC CGC GTG ACC ATG AGT AAG<sup>+</sup> GFPmut2

SpeI Sall XhoI EcoRV NheI NotI

MCS2

GFPmut2  
GGC ATG GAT GAA CTA TAC AAA<sup>+</sup> STOP

GGT CCG GAC GTC AGC TTA AGA TCT AGG CCT GCA TAA TGA TCT

BspEI AatII AflII BglII StuI

## D

pWTN2  
MCS1

OP4 minimal promoter  
TACGTTAACTCCTACACACATACAAATATAATA<sup>+</sup>

ACT AGT GTC GAC TCG AGA TAT CCA GCT AGC GGC CGC GTG ACC ATG AGT AAG<sup>+</sup> mCherry

SpeI Sall XhoI EcoRV NheI NotI

MCS2

mCherry  
GGC ATG GAT GAA CTA TAC AAA<sup>+</sup> STOP

GGT CCG GAC GTC AGC TTA AGA TCT AGG CCT GCA TAA TGA TCT

BspEI AatII AflII BglII StuI

Figure S2

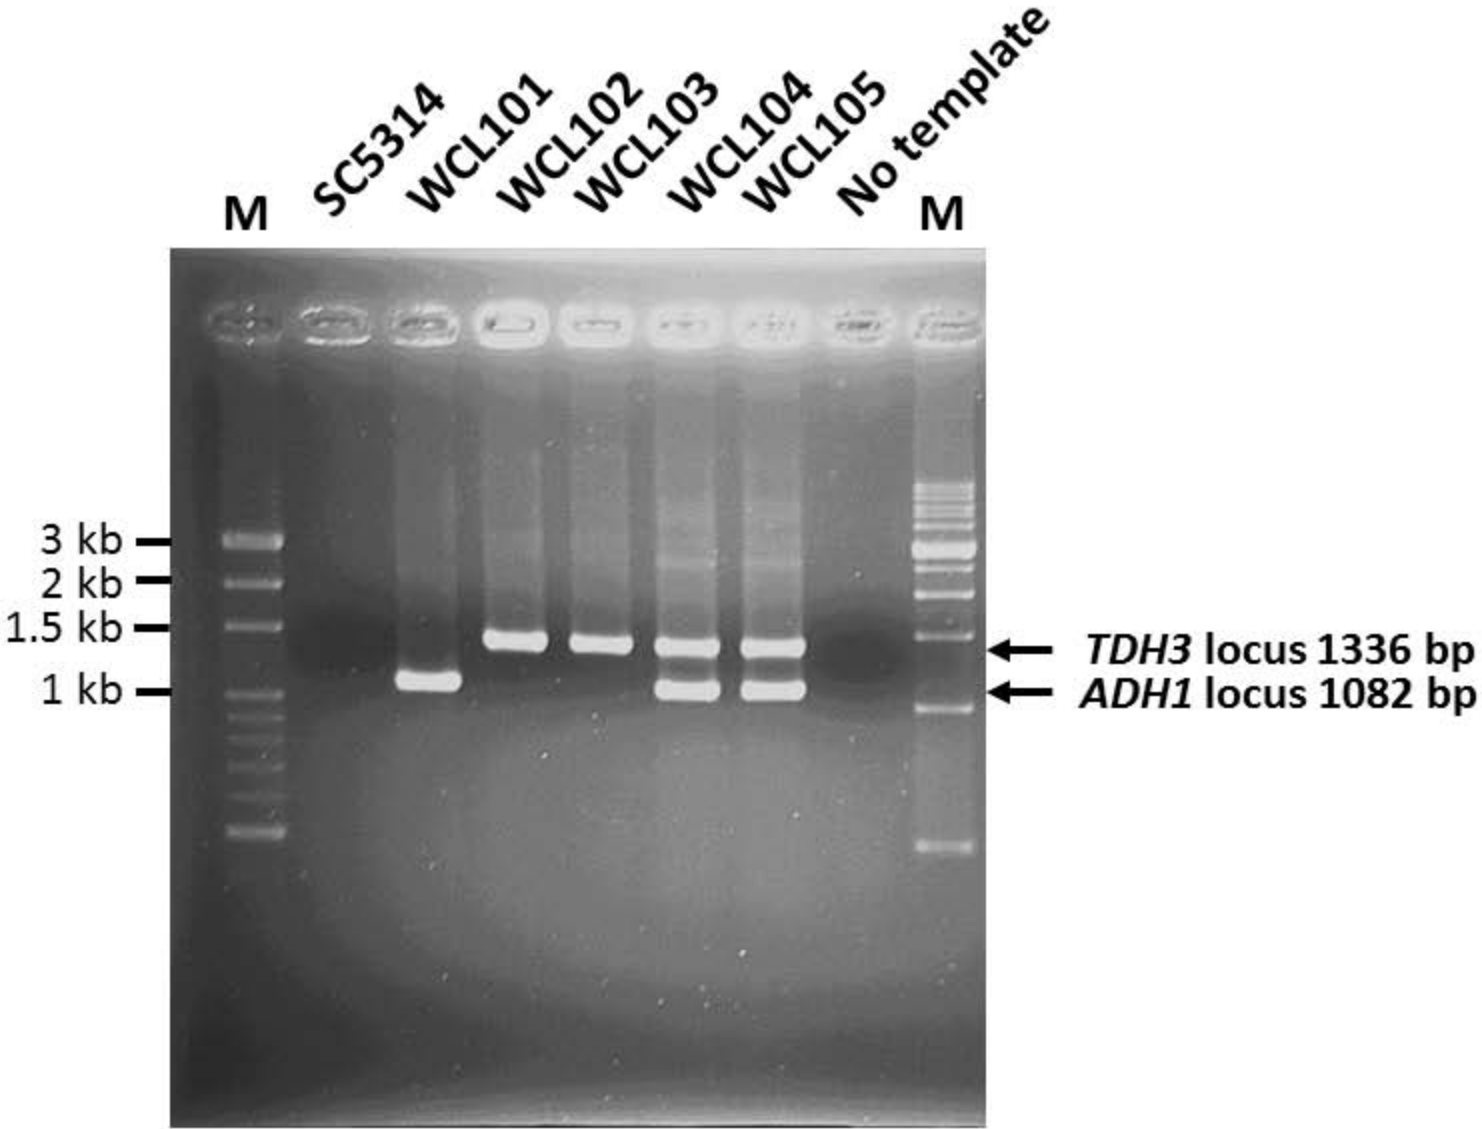



Figure S3

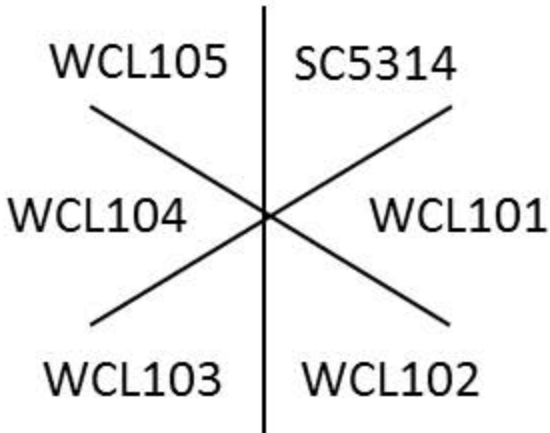

**Doxycycline**

+

**30°C**

**37°C**

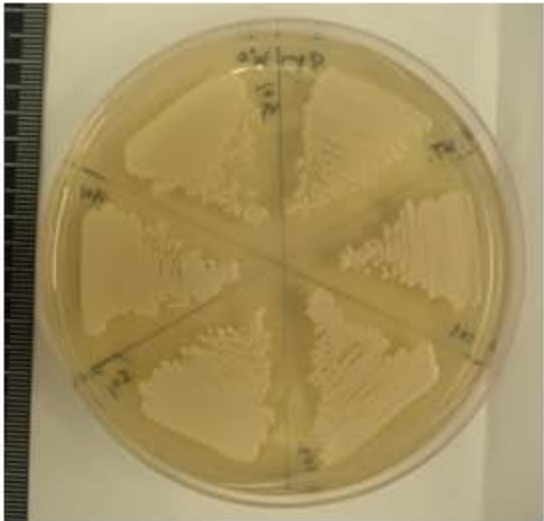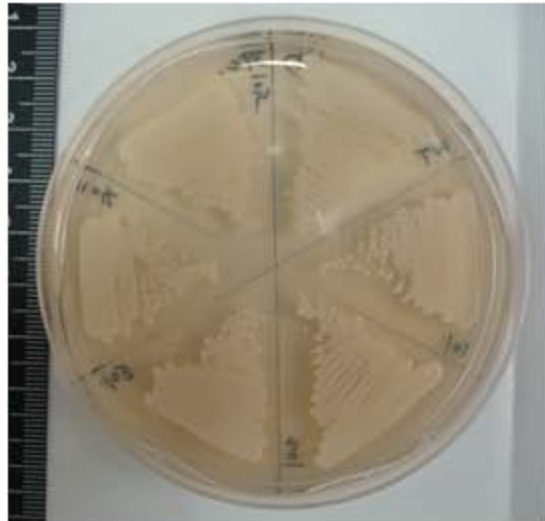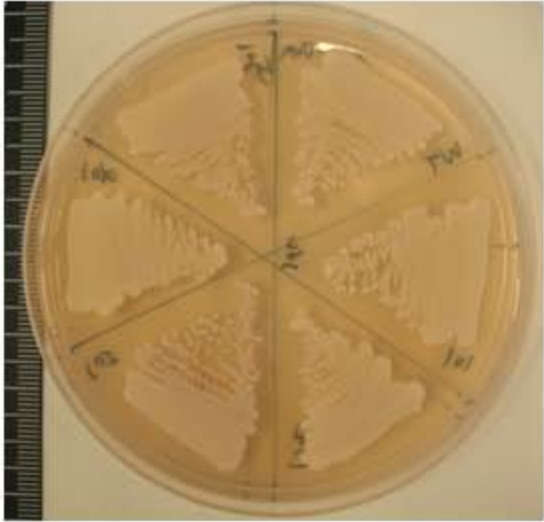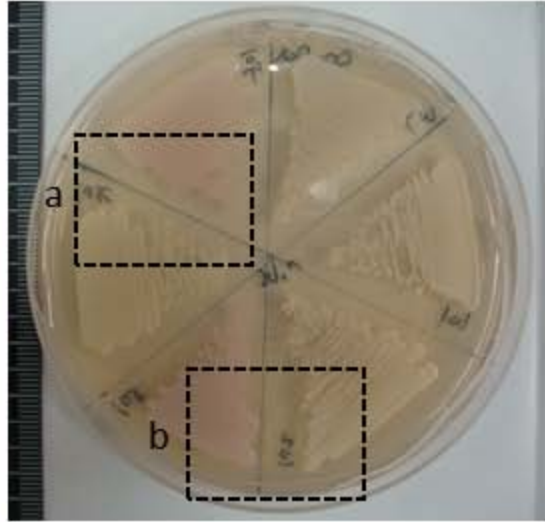

**a**

**b**

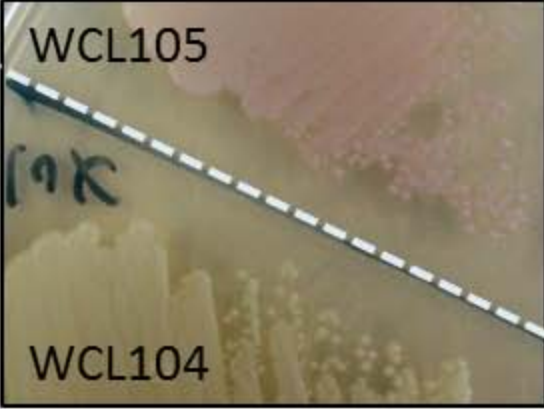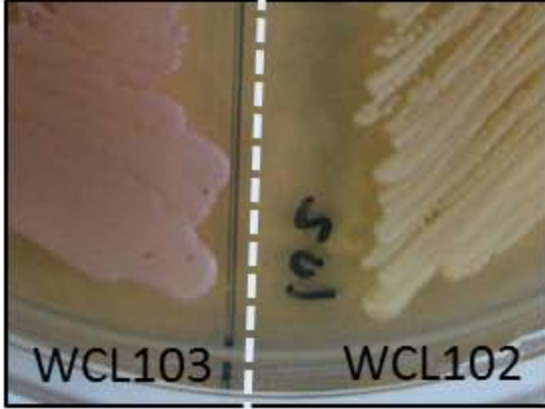

# Figure S4

## A

### WCL101

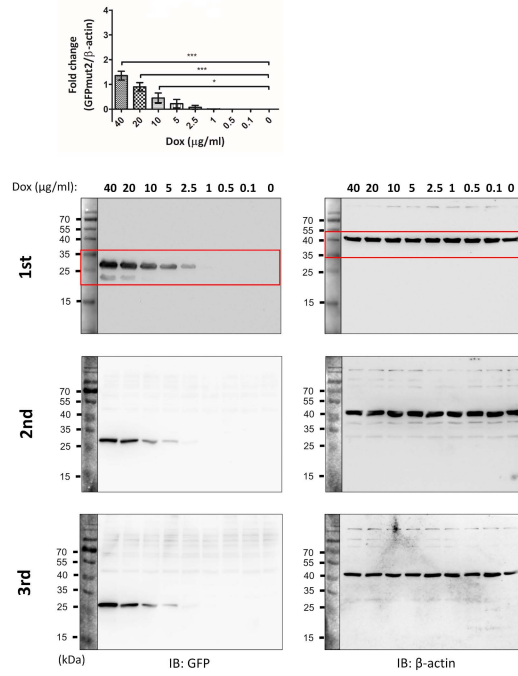

### WCL104

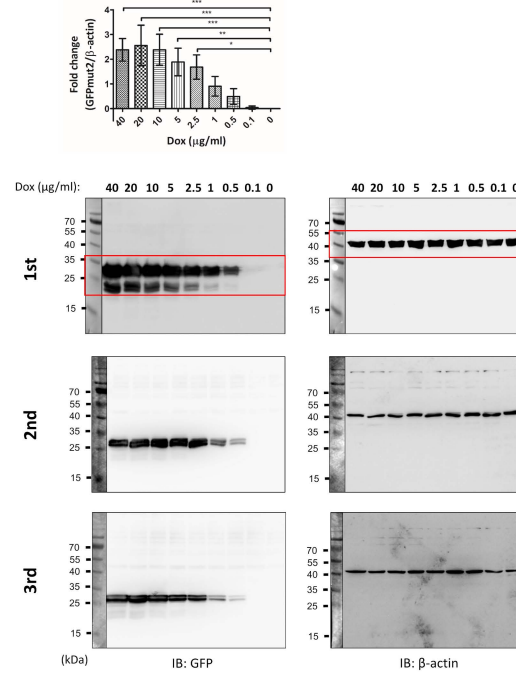

## B

### WCL103

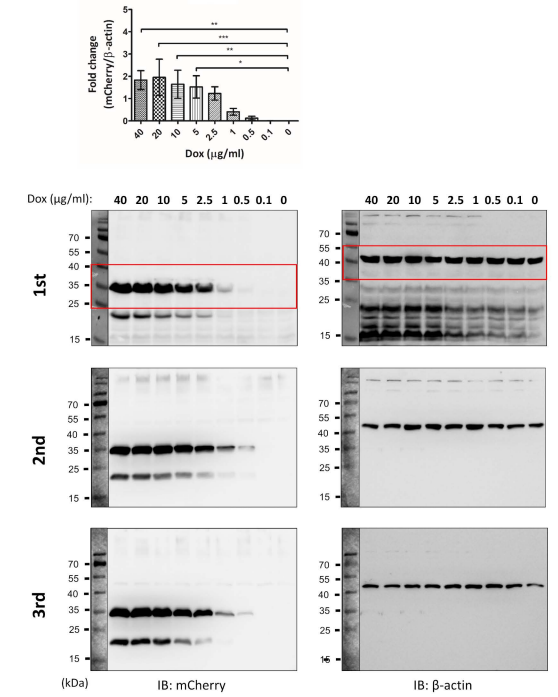

### WCL102

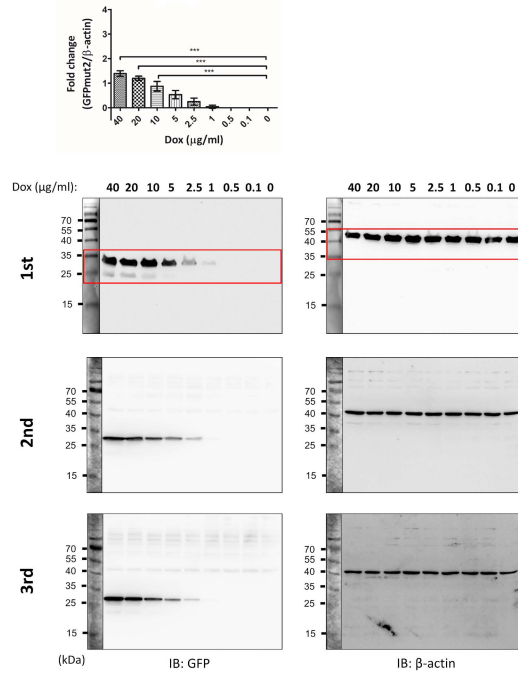

### WCL105

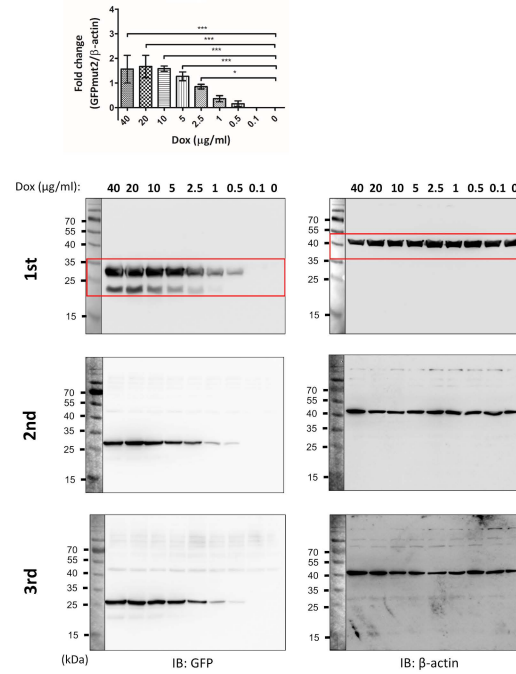

### WCL105

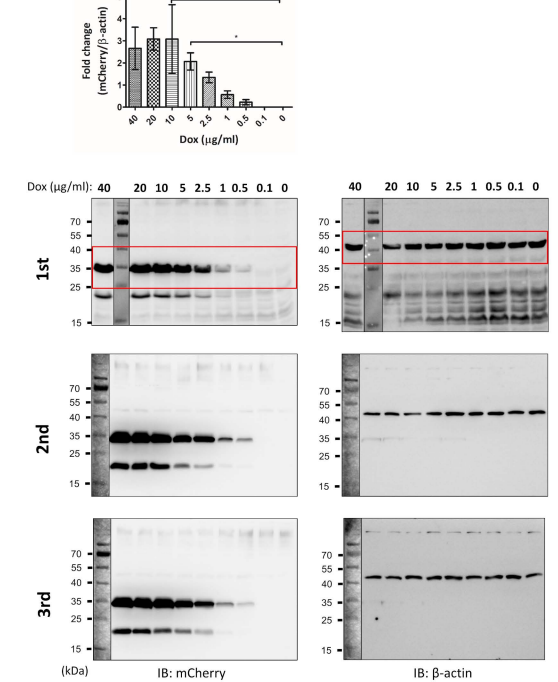

Figure S5

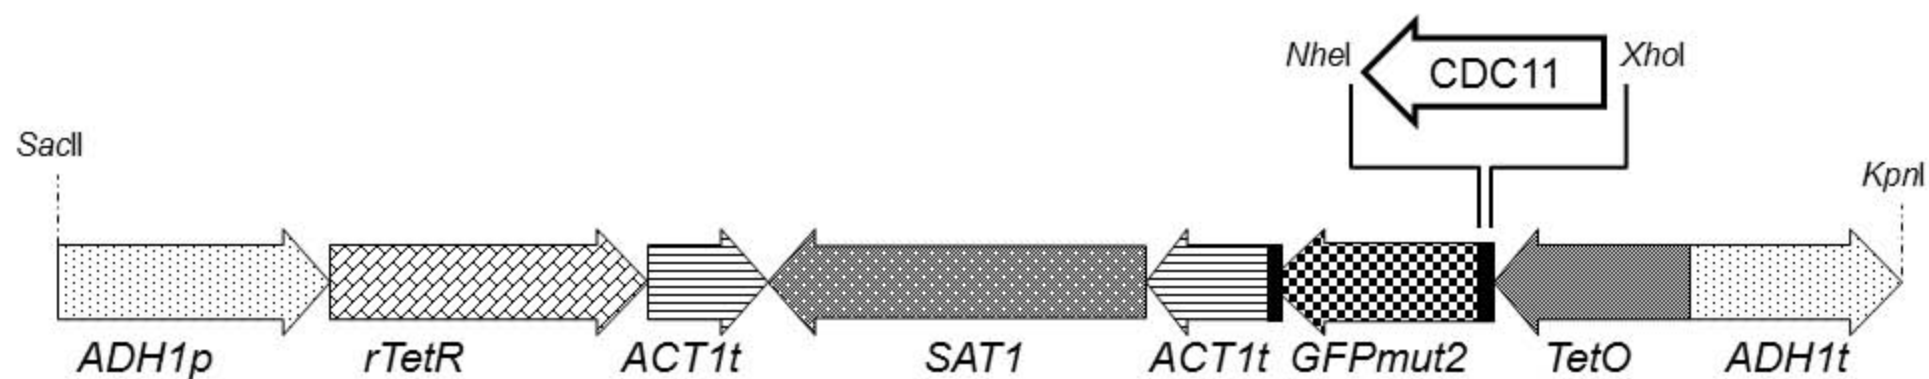

pNIM1-CDC11-GFP

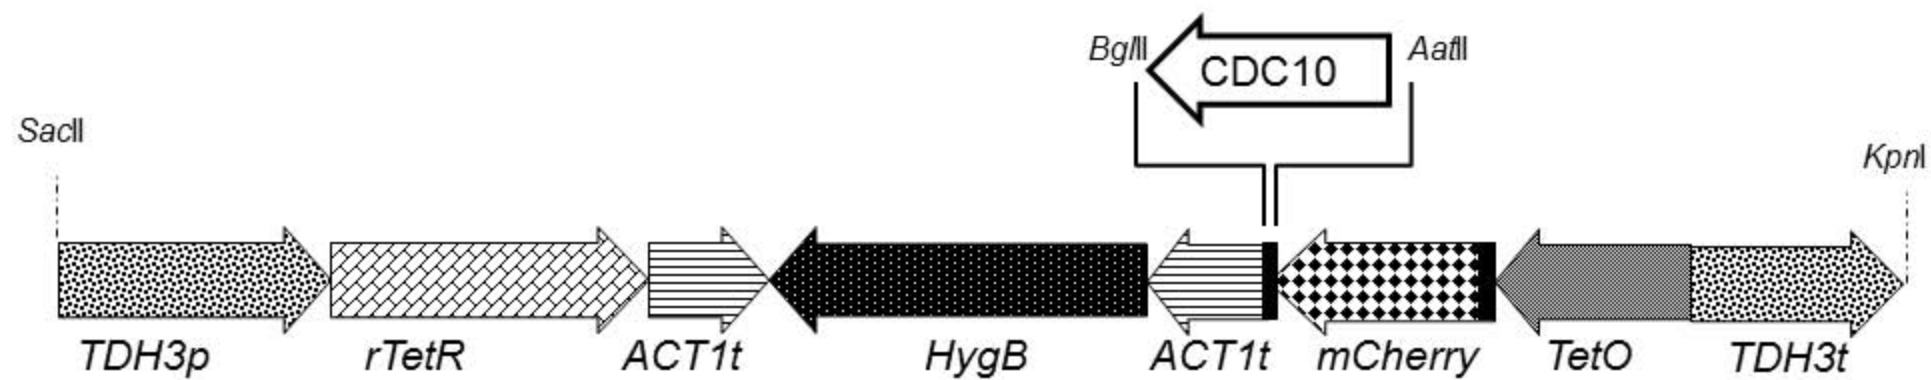

pWTN2-mCherry-CDC10

Figure S6

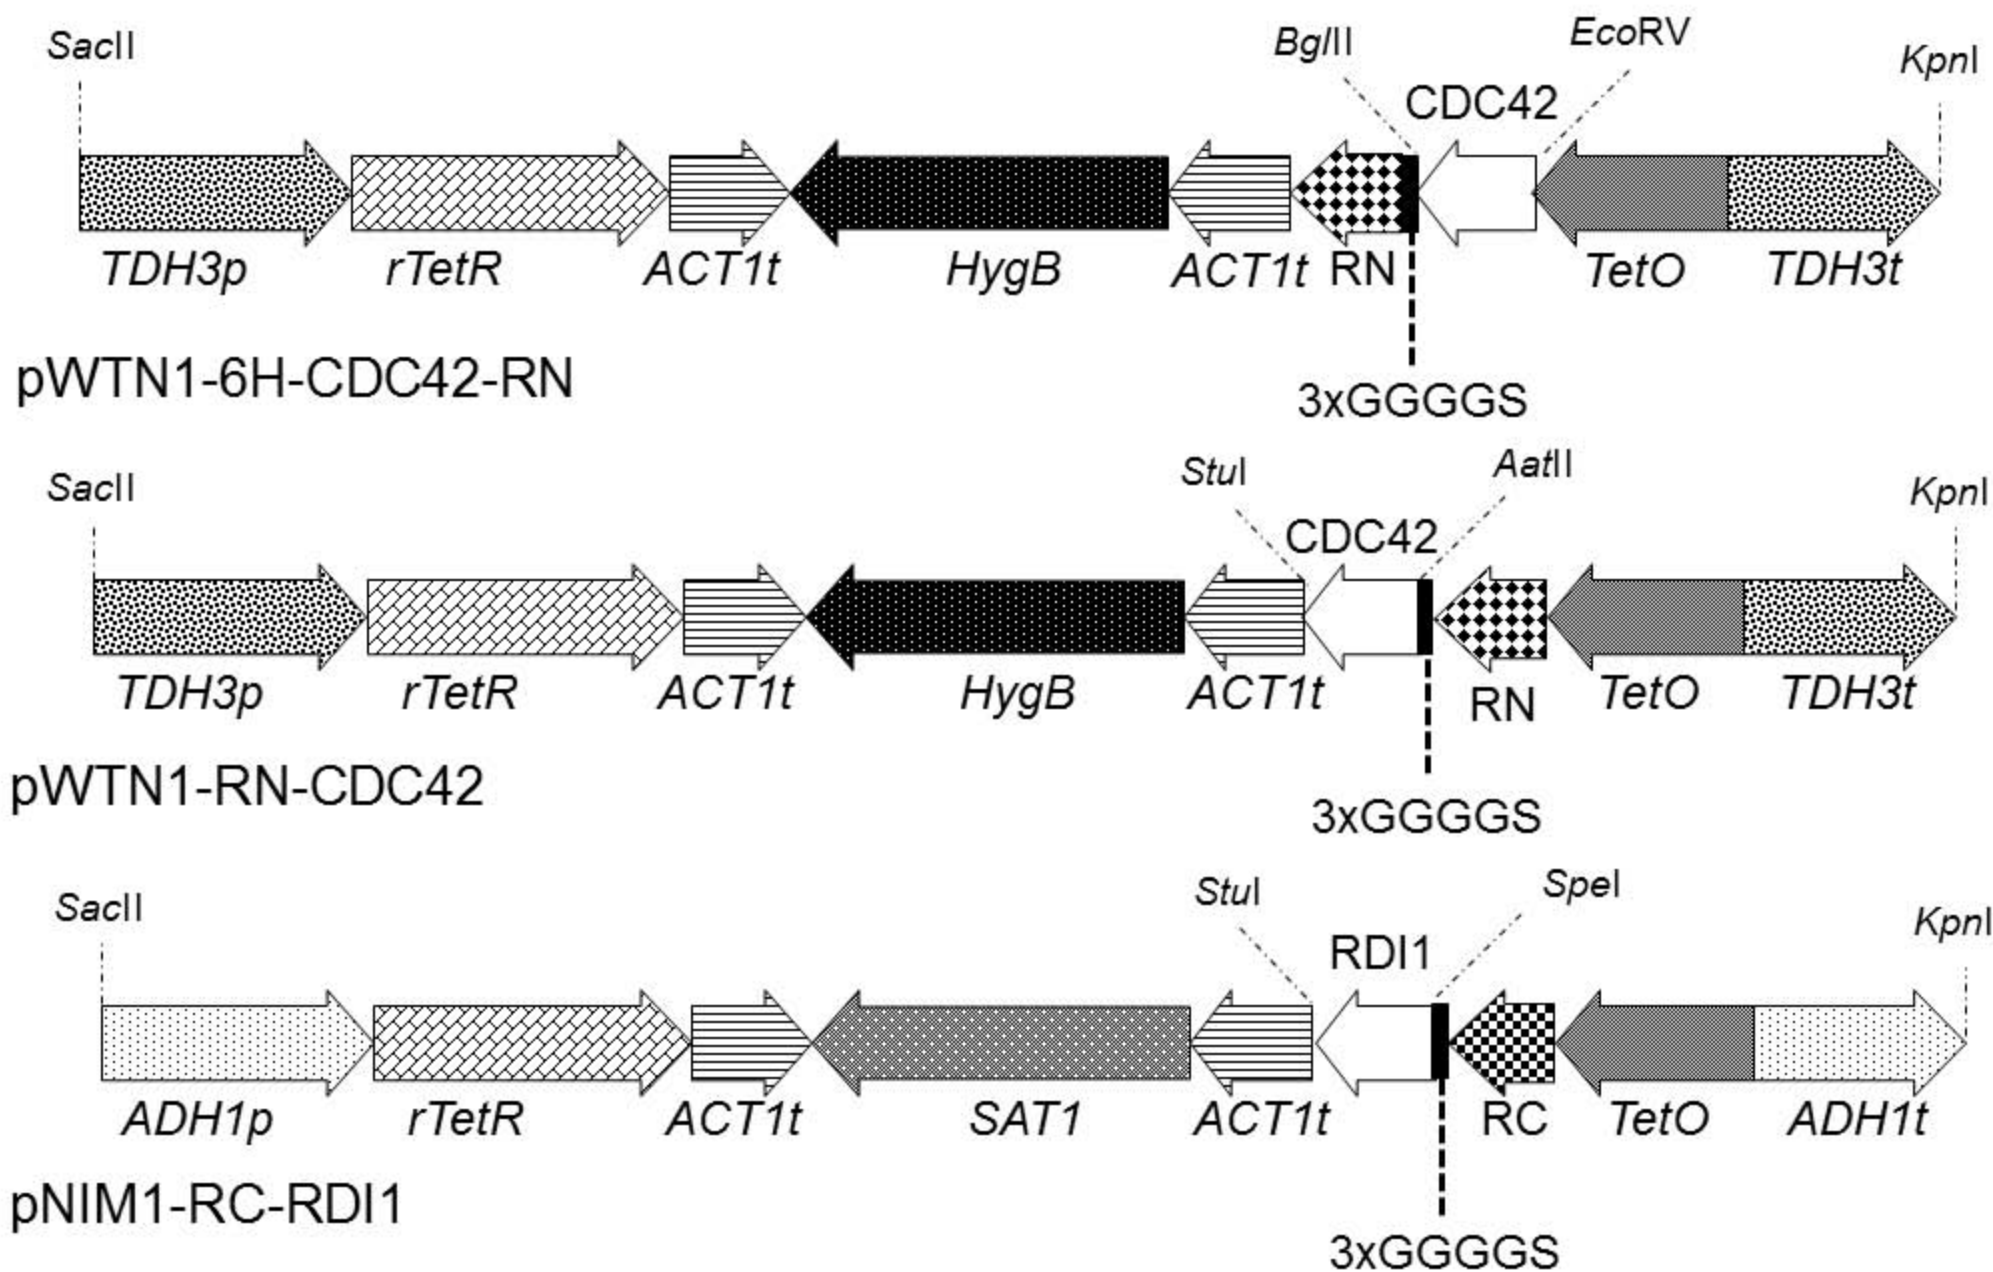

# Figure S7

## A

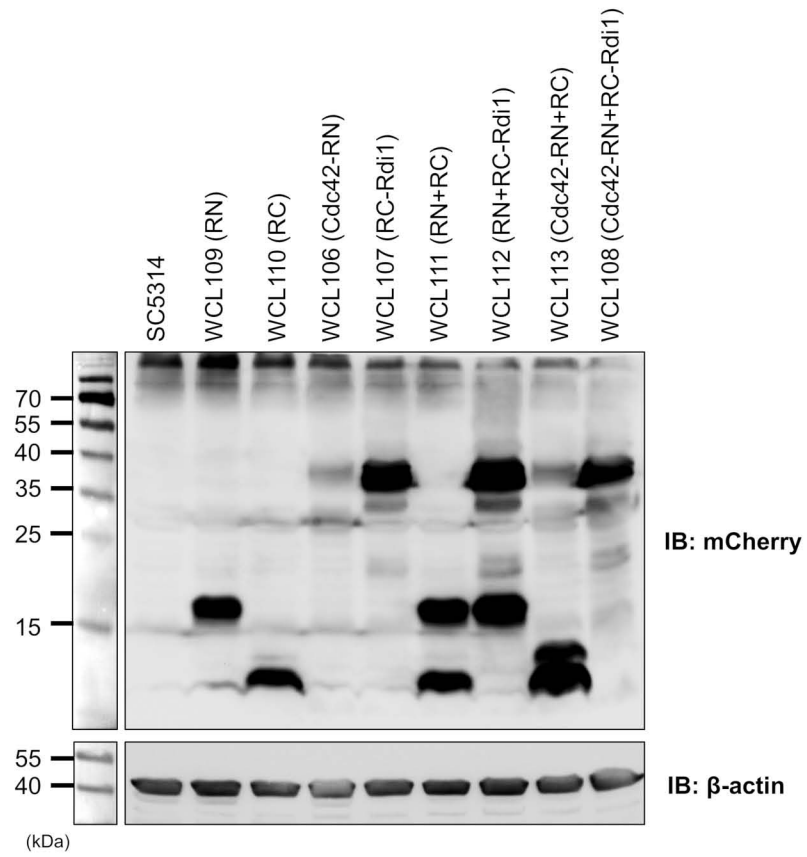

## B

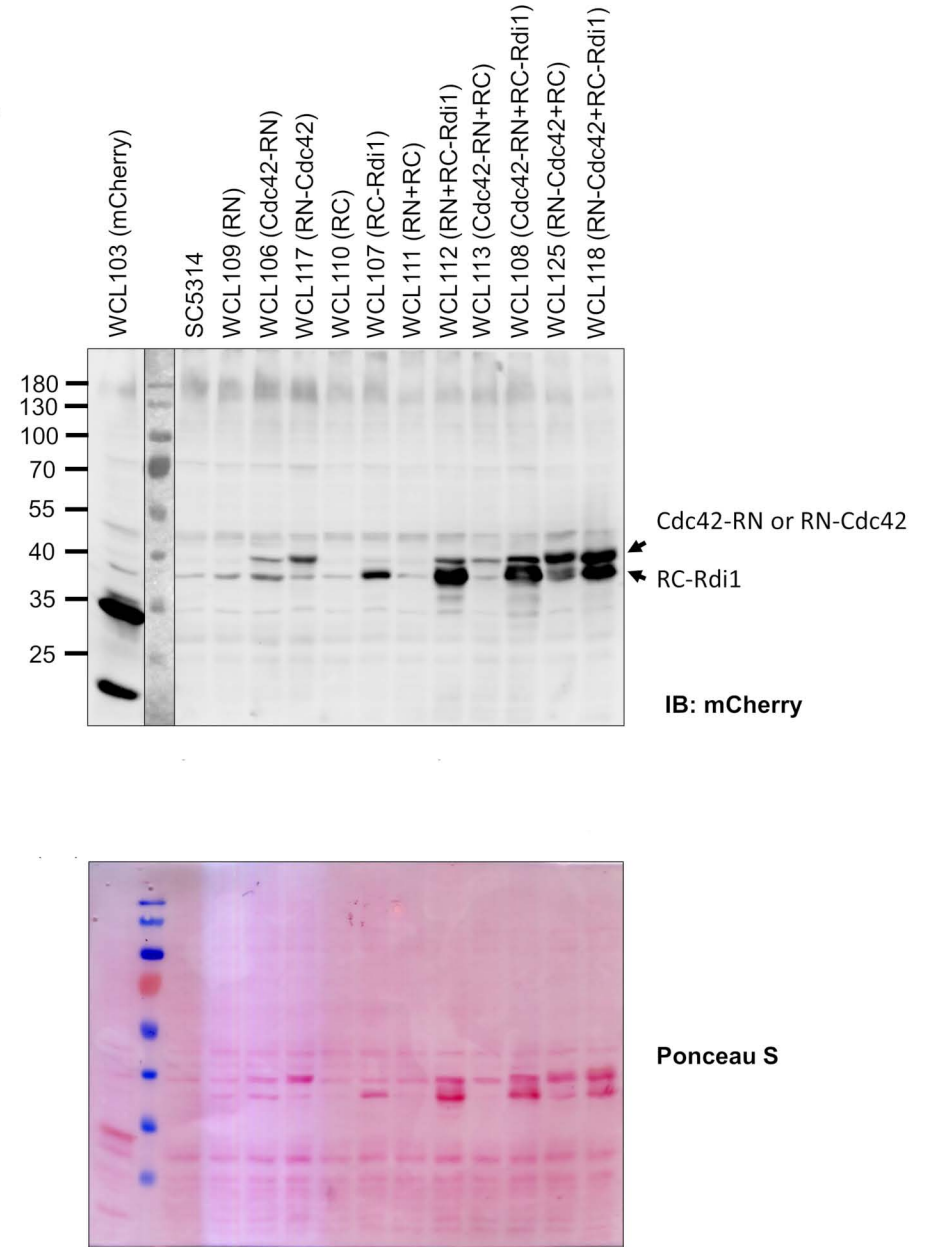

# Figure S8

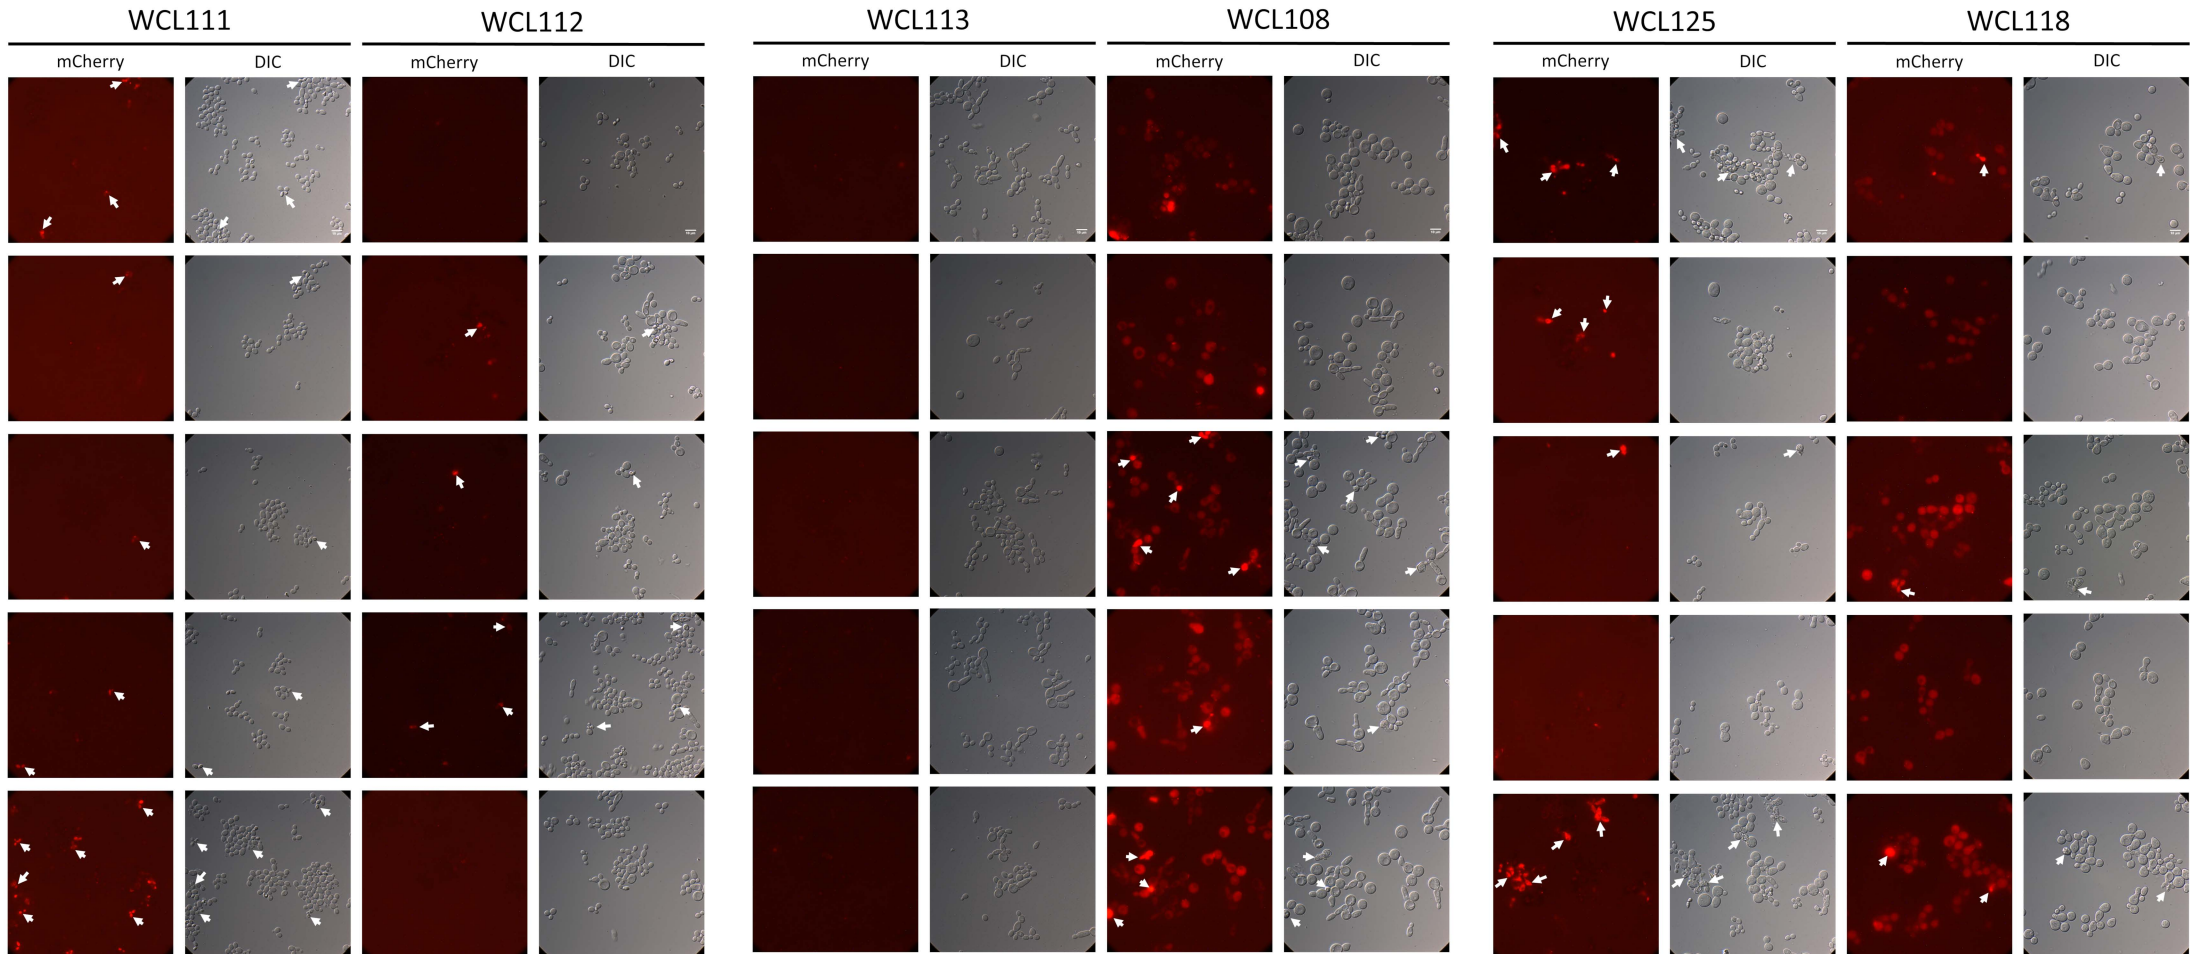

Table S1. The fold change of fluorescent proteins normalized to  $\beta$ -actin

| The fold change of GFPmut2 |     |         |         |         |         |         |         |         |         |   |
|----------------------------|-----|---------|---------|---------|---------|---------|---------|---------|---------|---|
| Dox                        | 40  | 20      | 10      | 5       | 2.5     | 1       | 0.5     | 0.1     | 0       |   |
| WCL101                     | 1st | 1.55269 | 1.09536 | 0.67766 | 0.41643 | 0.16501 | 0.00727 | 0       | 0       | 0 |
|                            | 2nd | 1.21654 | 0.81603 | 0.29995 | 0.10638 | 0.01546 | 0       | 0       | 0       | 0 |
|                            | 3rd | 1.28737 | 0.78532 | 0.36642 | 0.13556 | 0.0345  | 0       | 0       | 0       | 0 |
| WCL102                     | 1st | 1.48509 | 1.17231 | 1.10076 | 0.70593 | 0.40464 | 0.11413 | 0       | 0       | 0 |
|                            | 2nd | 1.26273 | 1.12735 | 0.76833 | 0.52711 | 0.21558 | 0.00872 | 0       | 0       | 0 |
|                            | 3rd | 1.42692 | 1.29619 | 0.74946 | 0.36797 | 0.12411 | 0.00318 | 0       | 0       | 0 |
| WCL104                     | 1st | 2.32642 | 1.62536 | 1.87504 | 1.54827 | 1.4413  | 1.18418 | 0.80493 | 0.12004 | 0 |
|                            | 2nd | 2.85967 | 3.18118 | 3.08442 | 2.53326 | 2.24862 | 1.07837 | 0.49934 | 0.00199 | 0 |
|                            | 3rd | 1.94842 | 2.85698 | 2.18766 | 1.57842 | 1.35224 | 0.45201 | 0.17548 | 0       | 0 |
| WCL105                     | 1st | 2.19384 | 1.41578 | 1.49152 | 1.33404 | 0.79681 | 0.50129 | 0.29095 | 0       | 0 |
|                            | 2nd | 1.38077 | 2.1934  | 1.70166 | 1.0701  | 0.7933  | 0.26362 | 0.10371 | 0       | 0 |
|                            | 3rd | 1.11951 | 1.39998 | 1.54947 | 1.40635 | 0.96103 | 0.31902 | 0.0766  | 0       | 0 |

The fold change of mCherry

| Dox    | 40  | 20      | 10      | 5       | 2.5     | 1       | 0.5     | 0.1     | 0       |   |
|--------|-----|---------|---------|---------|---------|---------|---------|---------|---------|---|
| WCL103 | 1st | 1.3942  | 1.35728 | 1.23381 | 1.27457 | 1.05335 | 0.2348  | 0.04405 | 0       | 0 |
|        | 2nd | 1.84679 | 1.62135 | 1.32196 | 1.19537 | 1.05811 | 0.50629 | 0.21322 | 0.00564 | 0 |
|        | 3rd | 2.24408 | 2.88347 | 2.36809 | 2.1005  | 1.57599 | 0.48178 | 0.11078 | 0       | 0 |
| WCL105 | 1st | 1.61926 | 2.6041  | 1.88367 | 1.6916  | 1.0964  | 0.38805 | 0.13104 | 0       | 0 |
|        | 2nd | 3.50836 | 3.61307 | 4.83686 | 2.46912 | 1.57268 | 0.73033 | 0.35689 | 0       | 0 |
|        | 3rd | 2.85236 | 3.03205 | 2.5166  | 2.03966 | 1.37062 | 0.57371 | 0.18325 | 0       | 0 |

## Table S2

Table Analyzed WCL105

One-way analysis of variance

P value < 0.0001

P value summary \*\*\*

Are means signif. diffe Yes

Number of groups 9

F 12

R squared 0.842

| ANOVA Table             | SS   | df | MS    |
|-------------------------|------|----|-------|
| Treatment (between c    | 41   | 8  | 5.13  |
| Residual (within colurr | 7.69 | 18 | 0.427 |
| Total                   | 48.7 | 26 |       |

| Bonferroni's Multiple C | Mean    | Diff.   | t   | Significan | Summary        | 95% CI of diff |
|-------------------------|---------|---------|-----|------------|----------------|----------------|
| 40 vs 20                | -0.423  | 0.793   | No  | ns         | -2.44 to 1.59  |                |
| 40 vs 10                | -0.419  | 0.785   | No  | ns         | -2.43 to 1.60  |                |
| 40 vs 5                 | 0.593   | 1.11    | No  | ns         | -1.42 to 2.61  |                |
| 40 vs 2.5               | 1.31    | 2.46    | No  | ns         | -0.701 to 3.33 |                |
| 40 vs 1                 | 2.1     | 3.93    | Yes | *          | 0.0814 to 4.11 |                |
| 40 vs 0.5               | 2.44    | 4.56    | Yes | **         | 0.422 to 4.45  |                |
| 40 vs 0.1               | 2.66    | 4.98    | Yes | **         | 0.645 to 4.67  |                |
| 40 vs 0                 | 2.66    | 4.98    | Yes | **         | 0.645 to 4.67  |                |
| 20 vs 10                | 0.00403 | 0.00755 | No  | ns         | -2.01 to 2.02  |                |
| 20 vs 5                 | 1.02    | 1.9     | No  | ns         | -0.998 to 3.03 |                |
| 20 vs 2.5               | 1.74    | 3.25    | No  | ns         | -0.278 to 3.75 |                |
| 20 vs 1                 | 2.52    | 4.72    | Yes | **         | 0.504 to 4.53  |                |
| 20 vs 0.5               | 2.86    | 5.36    | Yes | **         | 0.845 to 4.87  |                |
| 20 vs 0.1               | 3.08    | 5.78    | Yes | ***        | 1.07 to 5.10   |                |
| 20 vs 0                 | 3.08    | 5.78    | Yes | ***        | 1.07 to 5.10   |                |



|            |       |          |     |                |
|------------|-------|----------|-----|----------------|
| 10 vs 5    | 1.01  | 1.9 No   | ns  | -1.00 to 3.03  |
| 10 vs 2.5  | 1.73  | 3.25 No  | ns  | -0.282 to 3.75 |
| 10 vs 1    | 2.52  | 4.71 Yes | **  | 0.500 to 4.53  |
| 10 vs 0.5  | 2.86  | 5.35 Yes | **  | 0.841 to 4.87  |
| 10 vs 0.1  | 3.08  | 5.77 Yes | *** | 1.06 to 5.09   |
| 10 vs 0    | 3.08  | 5.77 Yes | *** | 1.06 to 5.09   |
| 5 vs 2.5   | 0.72  | 1.35 No  | ns  | -1.29 to 2.73  |
| 5 vs 1     | 1.5   | 2.82 No  | ns  | -0.512 to 3.52 |
| 5 vs 0.5   | 1.84  | 3.45 No  | ns  | -0.171 to 3.86 |
| 5 vs 0.1   | 2.07  | 3.87 Yes | *   | 0.0522 to 4.08 |
| 5 vs 0     | 2.07  | 3.87 Yes | *   | 0.0522 to 4.08 |
| 2.5 vs 1   | 0.783 | 1.47 No  | ns  | -1.23 to 2.80  |
| 2.5 vs 0.5 | 1.12  | 2.1 No   | ns  | -0.892 to 3.14 |
| 2.5 vs 0.1 | 1.35  | 2.52 No  | ns  | -0.668 to 3.36 |
| 2.5 vs 0   | 1.35  | 2.52 No  | ns  | -0.668 to 3.36 |
| 1 vs 0.5   | 0.34  | 0.638 No | ns  | -1.67 to 2.35  |
| 1 vs 0.1   | 0.564 | 1.06 No  | ns  | -1.45 to 2.58  |
| 1 vs 0     | 0.564 | 1.06 No  | ns  | -1.45 to 2.58  |
| 0.5 vs 0.1 | 0.224 | 0.419 No | ns  | -1.79 to 2.24  |
| 0.5 vs 0   | 0.224 | 0.419 No | ns  | -1.79 to 2.24  |
| 0.1 vs 0   | 0     | 0 No     | ns  | -2.01 to 2.01  |

| Table S3 | Fluorescence intensity | Background | Relative fluorescence intensity |
|----------|------------------------|------------|---------------------------------|
| 111-01   | 403135180              | 269639288  | 133495892                       |
| 111-02   | 448720573              | 443938763  | 4781810                         |
| 111-03   | 555902346              | 506644777  | 49257569                        |
| 111-04   | 559683988              | 481147510  | 78536478                        |
| 111-05   | 594341131              | 343077849  | 251263282                       |
| 112-01   | 680061973              | 379374875  | 300687098                       |
| 112-02   | 528347707              | 466163889  | 62183818                        |
| 112-03   | 617667851              | 131066558  | 486601293                       |
| 112-04   | 519397343              | 510711891  | 8685452                         |
| 112-05   | 466118492              | 339227103  | 126891389                       |
| 113-01   | 634830657              | 382575063  | 252255594                       |
| 113-03   | 447672375              | 288624417  | 159047958                       |
| 113-04   | 599250648              | 411185737  | 188064911                       |
| 113-05   | 506836950              | 383156649  | 123680301                       |
| 113-06   | 543291082              | 315674767  | 227616315                       |
| 108-02   | 605187621              | 66832980   | 538354641                       |
| 108-03   | 764939886              | 62036319   | 702903567                       |
| 108-05   | 583481883              | 138802228  | 444679655                       |
| 108-06   | 689366439              | 54893543   | 634472896                       |
| 108-07   | 712927804              | 23101343   | 689826461                       |
| 125-01   | 579177698              | 271183183  | 307994515                       |
| 125-02   | 403557409              | 177314939  | 226242470                       |
| 125-03   | 532050741              | 69337245   | 462713496                       |
| 125-05   | 393385689              | 221194820  | 172190869                       |
| 125-06   | 547854337              | 148766586  | 399087751                       |
| 118-04   | 706757063              | 94501878   | 612255185                       |
| 118-05   | 690875860              | 65625461   | 625250399                       |
| 118-07   | 737296897              | 53086554   | 684210343                       |
| 118-08   | 720793820              | 31605912   | 689187908                       |
| 118-09   | 622248178              | 95229345   | 527018833                       |
